# Supplementary material
Source: PubMed Central journal article supplement (PMC4334755)
Supplement: NIHMS612512-supplement-Supp_TableS1.pdf [file NIHMS612512-supplement-Supp_TableS1.pdf]

Table S1: Prevalence, mortality and major adverse events stratified by acute kidney injury, anatomic location of surgery and primary diagnosis.

| Outcomes                   | Anatomic location of surgery                 |                               |                                                      | Primary diagnosis           |                                          |                                 |
|----------------------------|----------------------------------------------|-------------------------------|------------------------------------------------------|-----------------------------|------------------------------------------|---------------------------------|
|                            | Uterine/<br>Fallopian<br>surgery<br>(n=1688) | Ovarian<br>surgery<br>(n=448) | Vulva /<br>Perineum<br>Vaginal<br>surgery<br>(n=205) | Benign<br>tumors<br>(n=801) | Non-<br>neoplastic<br>disease<br>(n=381) | Malignant<br>tumors<br>(n=1159) |
| Acute kidney injury, n (%) | 196 (12)                                     | 65 (15)                       | 34 (17)                                              | 43 (5)                      | 41 (10) <sup>a</sup>                     | 211 (18) <sup>b</sup>           |
| Hospital mortality, n (%)  |                                              |                               |                                                      |                             |                                          |                                 |
| All patients               | 16 (1)                                       | 5 (1)                         | 1 (0.5)                                              | 1 (0.1)                     | 1 (0.3)                                  | 20 (2)                          |
| Acute kidney injury        | 14 (7) <sup>c</sup>                          | 5 (8) <sup>c</sup>            | 1 (3) <sup>c</sup>                                   | 1 (2) <sup>c</sup>          | 1 (2)                                    | 18 (9) <sup>c</sup>             |
| No acute kidney injury     | 2 (0.1)                                      | 0 (0)                         | 0 (0)                                                | 0 (0)                       | 0 (0)                                    | 2 (0.2)                         |
| 90-day mortality, n (%)    |                                              |                               |                                                      |                             |                                          |                                 |
| All patients               | 28 (2)                                       | 9 (2)                         | 2 (1)                                                | 1 (0.1)                     | 2 (0.5)                                  | 36 (3)                          |
| Acute kidney injury        | 20 (10) <sup>c</sup>                         | 7 (11) <sup>c</sup>           | 2 (6) <sup>c</sup>                                   | 1 (2) <sup>c</sup>          | 1 (2)                                    | 18 (9) <sup>c</sup>             |
| No acute kidney injury     | 8 (0.5)                                      | 2 (0.5)                       | 0 (0)                                                | 0 (0)                       | 1 (0.3)                                  | 9 (1)                           |
| Major adverse event, n     |                                              |                               |                                                      |                             |                                          |                                 |
| (%)                        | 69 (4)                                       | 24 (5)                        | 8 (4)                                                | 15 (2)                      | 16 (4)                                   | 70 (6)                          |
| All patients               | 48 (24) <sup>c</sup>                         | 18 (28) <sup>c</sup>          | 6 (18) <sup>c</sup>                                  | 11 (26) <sup>c</sup>        | 9 (22) <sup>c</sup>                      | 52 (25) <sup>c</sup>            |
| Acute kidney injury        | 21 (1)                                       | 6 (2)                         | 2 (1)                                                | 4 (0.5)                     | 7 (2) <sup>a</sup>                       | 18 (2) <sup>a</sup>             |
| No acute kidney injury     |                                              |                               |                                                      |                             |                                          |                                 |

Major

adverse event is defined as the occurrence of mortality, sepsis, or mechanical ventilation.

P<0.01 comparing to <sup>a</sup> benign tumors group and to <sup>b</sup> benign tumors and non-neoplastic disease groups using Bonferroni correction for Pearson  $\chi^2$  test or Fisher's exact test.

<sup>c</sup> P<0.01 using for Pearson  $\chi^2$  test or Fisher's exact test to compare to no AKI group.
